# Supplementary material
Source: ML conference proceedings conference paper supplement (https://proceedings.mlr.press/v89/yang19a.html)
Supplement: Supplementary file [file yang19a-supp.pdf]

---

# A Stein–Papangelou Goodness-of-Fit Test for Point Processes (Appendix)

---

## A Omitted Proofs and Results

**Proof of Theorem 5.** By the reproducing property of  $\mathcal{H}$ ,  $h(\phi) = \langle h(\cdot), k(\phi, \cdot) \rangle_{\mathcal{H}_k}$ . For any  $x \in \mathbb{X}$ , we have

$$\begin{aligned} (\mathcal{D}_x^+ h)(\phi) &= \langle h(\cdot), k(\phi + \delta_x, \cdot) \rangle_{\mathcal{H}_k} - \langle h(\cdot), k(\phi, \cdot) \rangle_{\mathcal{H}_k} = \langle h(\cdot), (\mathcal{D}_x^+ k)(\phi, \cdot) \rangle_{\mathcal{H}_k}; \\ (\mathcal{D}_x^- h)(\phi) &= \langle h(\cdot), k(\phi, \cdot) \rangle_{\mathcal{H}_k} - \langle h(\cdot), k(\phi - \delta_x, \cdot) \rangle_{\mathcal{H}_k} = \langle h(\cdot), (\mathcal{D}_x^- k)(\phi, \cdot) \rangle_{\mathcal{H}_k}. \end{aligned}$$

Thus, by Eq. (7),

$$\begin{aligned} \mathbb{E}_{\Phi \sim \eta} [\mathcal{A}_\rho h(\Phi)] &= \mathbb{E}_{\Phi \sim \eta} \left[ \int_{\mathbb{X}} (\mathcal{D}_x^+ h)(\Phi) \rho(x|\Phi) dx - \int_{y \in \mathbb{X}} (\mathcal{D}_x^- h)(\Phi) \Phi(dx) \right] \\ &= \mathbb{E}_{\Phi \sim \eta} \left[ \int_{\mathbb{X}} \langle h(\cdot), (\mathcal{D}_x^+ k)(\Phi, \cdot) \rangle_{\mathcal{H}_k} \rho(x|\Phi) dx - \int_{y \in \mathbb{X}} \langle h(\cdot), (\mathcal{D}_x^- k)(\Phi, \cdot) \rangle_{\mathcal{H}_k} \Phi(dx) \right] \\ &= \mathbb{E}_{\Phi \sim \eta} \left[ \left\langle h(\cdot), \int_{\mathbb{X}} (\mathcal{D}_x^+ k)(\Phi, \cdot) \rho(x|\Phi) dx \right\rangle_{\mathcal{H}_k} - \left\langle h(\cdot), \int_{\mathbb{X}} (\mathcal{D}_x^- k)(\Phi, \cdot) \Phi(dx) \right\rangle_{\mathcal{H}_k} \right] \\ &= \langle h(\cdot), \mathbb{E}_{\Phi \sim \eta} [\mathcal{A}_\rho k(\Phi, \cdot)] \rangle_{\mathcal{H}_k}. \end{aligned}$$

Defining  $\beta_{\eta, \rho} := \mathbb{E}_{\Phi \sim \eta} [\mathcal{A}_\rho k(\Phi, \cdot)]$ , we can rewrite the kernelized Stein discrepancy as

$$\mathbb{D}_{\mathcal{H}_k}(\eta \| \rho) = \sup_{h \in \mathcal{H}, \|h\|_{\mathcal{H}_k} \leq 1} \langle h, \beta_{\eta, \rho} \rangle_{\mathcal{H}_k},$$

which immediately implies that  $\mathbb{D}_{\mathcal{H}_k}(\eta \| \rho) = \|\beta_{\eta, \rho}\|_{\mathcal{H}_k}$  since the supremum will be obtained by  $h = \beta_{\eta, \rho} / \|\beta_{\eta, \rho}\|_{\mathcal{H}_k}$ . Therefore, we can write

$$\begin{aligned} \mathbb{D}_{\mathcal{H}_k}^2(\eta \| \rho) &= \|\beta_{\eta, \rho}\|_{\mathcal{H}_k}^2 = \langle \mathbb{E}_{\Phi \sim \eta} [\mathcal{A}_\rho^\Phi k(\Phi, \cdot)], \mathbb{E}_{\Psi \sim \eta} [\mathcal{A}_\rho^\Psi k(\Psi, \cdot)] \rangle_{\mathcal{H}_k} = \mathbb{E}_{\Phi, \Psi \sim \eta} \left[ \langle \mathcal{A}_\rho^\Phi k(\Phi, \cdot), \mathcal{A}_\rho^\Psi k(\Psi, \cdot) \rangle_{\mathcal{H}_k} \right] \\ &= \mathbb{E}_{\Phi, \Psi \sim \eta} [\mathcal{A}_\rho^\Phi \mathcal{A}_\rho^\Psi \langle k(\Phi, \cdot), k(\Psi, \cdot) \rangle_{\mathcal{H}_k}] = \mathbb{E}_{\Phi, \Psi \sim \eta} [\mathcal{A}_\rho^\Phi \mathcal{A}_\rho^\Psi k(\Phi, \Psi)], \end{aligned}$$

where we applied the reproducing property,  $\langle k(\Phi, \cdot), k(\Psi, \cdot) \rangle_{\mathcal{H}_k} = k(\Phi, \Psi)$ .

*Deriving the expression in Eq. (12).* Fixing  $\psi$  and applying Eq. (7) to  $k(\phi, \psi)$  viewed as a function of  $\phi$ , we have

$$\mathcal{A}_\rho^\phi k(\phi, \psi) = \int_{\mathbb{X}} [k(\phi + \delta_u, \psi) - k(\phi, \psi)] \rho(u|\phi) du + \sum_{x \in \phi} [k(\phi - \delta_x, \psi) - k(\phi, \psi)].$$

Now, fixing  $\phi$  and applying Eq. (7) to  $\mathcal{A}_\rho^\phi k(\phi, \psi)$  viewed as a function of  $\psi$ , we have

$$\begin{aligned} \mathcal{A}_\rho^\psi \mathcal{A}_\rho^\phi k(\phi, \psi) &= \int_{\mathbb{X}} [\mathcal{A}_\rho^\phi k(\phi, \psi + \delta_v) - \mathcal{A}_\rho^\phi k(\phi, \psi)] \rho(v|\psi) dv + \sum_{y \in \psi} [\mathcal{A}_\rho^\phi k(\phi, \psi - \delta_y) - \mathcal{A}_\rho^\phi k(\phi, \psi)] \\ &= \int_{\mathbb{X}} \left[ \left( \int_{\mathbb{X}} [k(\phi + \delta_u, \psi + \delta_v) - k(\phi, \psi + \delta_v)] \rho(u|\phi) du + \sum_{x \in \phi} [k(\phi - \delta_x, \psi + \delta_v) - k(\phi, \psi + \delta_v)] \right) \right. \\ &\quad \left. - \left( \int_{\mathbb{X}} [k(\phi + \delta_u, \psi) - k(\phi, \psi)] \rho(u|\phi) du + \sum_{x \in \phi} [k(\phi - \delta_x, \psi) - k(\phi, \psi)] \right) \right] \rho(v|\psi) dv \end{aligned}$$

$$\begin{aligned}
 & + \sum_{y \in \psi} \left[ \left( \int_{\mathbb{X}} [k(\phi + \delta_u, \psi - \delta_y) - k(\phi, \psi - \delta_y)] \rho(u|\phi) \, du + \sum_{x \in \phi} [k(\phi - \delta_x, \psi - \delta_y) - k(\phi, \psi - \delta_y)] \right) \right. \\
 & \quad \left. - \left( \int_{\mathbb{X}} [k(\phi + \delta_u, \psi) - k(\phi, \psi)] \rho(u|\phi) \, du + \sum_{x \in \phi} [k(\phi - \delta_x, \psi) - k(\phi, \psi)] \right) \right] \\
 & = \int_{\mathbb{X}} \int_{\mathbb{X}} \left[ k(\phi + \delta_u, \psi + \delta_v) - k(\phi, \psi + \delta_v) - k(\phi + \delta_u, \psi) + k(\phi, \psi) \right] \rho(u|\phi) \rho(v|\psi) \, dudv \\
 & \quad + \int_{\mathbb{X}} \left[ \sum_{x \in \phi} [k(\phi - \delta_x, \psi + \delta_v) - k(\phi - \delta_x, \psi)] - |\phi| \cdot [k(\phi, \psi + \delta_v) - k(\phi, \psi)] \right] \rho(v|\psi) \, dv \\
 & \quad + \int_{\mathbb{X}} \left[ \sum_{y \in \psi} [k(\phi + \delta_u, \psi - \delta_y) - k(\phi, \psi - \delta_y)] - |\psi| \cdot [k(\phi + \delta_u, \psi) - k(\phi, \psi)] \right] \rho(u|\phi) \, du \\
 & \quad + \left[ \sum_{x \in \phi} \sum_{y \in \psi} k(\phi - \delta_x, \psi - \delta_y) - |\phi| \cdot \sum_{y \in \psi} k(\phi, \psi - \delta_y) - |\psi| \cdot \sum_{x \in \phi} k(\phi - \delta_x, \psi) + |\phi| \cdot |\psi| \cdot k(\phi, \psi) \right],
 \end{aligned}$$

which recovers the expression in Eq. (12). This concludes the proof of Theorem 5.  $\square$

**Theorem 7** (Adapted from [30]). *Let  $k(\cdot, \cdot)$  be a positive definite kernel on  $\mathcal{N}_{\mathbb{X}}$ , and assume that  $\mathbb{E}_{\Phi, \Psi \sim \eta} [\kappa_{\rho}(\Phi, \Psi)^2] < \infty$ . We have the following two cases:*

(i) *If  $\eta \neq \rho$ , then  $\widehat{\mathbb{S}}(\eta \parallel \rho)$  is asymptotically normal:*

$$\sqrt{m} \left( \widehat{\mathbb{S}}(\eta \parallel \rho) - \mathbb{S}(\eta \parallel \rho) \right) \xrightarrow{\mathcal{D}} \mathcal{N}(0, \sigma^2),$$

where  $\sigma^2 = \text{Var}_{\Phi \sim \eta}(\mathbb{E}_{\Psi \sim \eta} [\kappa_{\rho}(\Phi, \Psi)]) > 0$ .

(ii) *If  $\eta = \rho$ , then  $\sigma^2 = 0$ , and the  $U$ -statistic is degenerate.*

**Lemma 8** (Schoenberg [37]). *The function*

$$k(x, y) := \exp \left\{ -\frac{f(x, y)}{\ell} \right\}$$

defined on a domain  $\mathcal{D}$  is a positive definite kernel for all  $\ell > 0$  if and only if  $f$  is a conditionally negative definite function, i.e.,  $\sum_{i,j=1}^n c_i c_j f(x_i, x_j) \leq 0$  for all  $n \in \mathbb{N}$ ,  $x_1, \dots, x_n \in \mathcal{D}$ , and  $c_1, \dots, c_n \in \mathbb{R}$  such that  $\sum_{i=1}^n c_i = 0$ .

**Proof of Proposition 6.** Denote

$$\xi(\phi, \psi) := \sum_{x \in \phi} \sum_{y \in \psi} k_{\mathbb{X}}(x, y). \quad (17)$$

By Proposition 3.1 of [17],  $\xi(\cdot, \cdot)$  is a p.d. kernel on  $\mathcal{N}_{\mathbb{X}}$  if  $k_{\mathbb{X}}$  is a p.d. kernel on  $\mathbb{X}$ . By Lemma 8, to show that Eq. (15) defines a p.d. kernel, it suffices to show that  $\widehat{d}^2$  is a conditionally negative-definite function. To this end, observe that for any  $n \in \mathbb{N}$ ,  $\phi_1, \dots, \phi_n \in \mathcal{N}_{\mathbb{X}}$ , and  $c_1, \dots, c_n \in \mathbb{R}$  satisfying  $\sum_{i=1}^n c_i = 0$ , we have

$$\begin{aligned}
 \sum_{i=1}^n \sum_{j=1}^n c_i c_j \widehat{d}^2(\phi_i, \phi_j) & = \frac{1}{|\phi|^2} \left( \sum_{i=1}^n c_i \sum_{x \in \phi_i} \sum_{x' \in \phi_i} k_{\mathbb{X}}(x, x') \right) \left( \sum_{j=1}^n c_j \right) + \frac{1}{|\psi|^2} \left( \sum_{i=1}^n c_i \right) \left( \sum_{j=1}^n c_j \sum_{y \in \phi_j} \sum_{y' \in \phi_j} k_{\mathbb{X}}(y, y') \right) \\
 & \quad - \frac{2}{|\phi_i| \cdot |\phi_j|} \sum_{i=1}^n \sum_{j=1}^n c_i c_j \xi(\phi_i, \phi_j) \\
 & = - \frac{2}{|\phi_i| \cdot |\phi_j|} \sum_{i=1}^n \sum_{j=1}^n c_i c_j \xi(\phi_i, \phi_j) \\
 & \leq 0,
 \end{aligned}$$

where we used the fact that  $\xi(\cdot, \cdot)$  is a p.d. kernel on  $\mathcal{N}_{\mathbb{X}}$ . Thus, the proof is complete.  $\square$

## B KSD Goodness-of-Fit Testing Algorithm

The KSD goodness-of-fit testing procedure is summarized in Algorithm 1.

---

### Algorithm 1 KSD goodness-of-fit test for point processes

---

- 1: **Input:** Papangelou conditional intensity  $\rho$ , point configurations  $\{\mathcal{X}_i\}_{i=1}^m \sim \eta$ , kernel function  $k(\cdot, \cdot)$  on  $\mathcal{N}_{\mathbb{X}}$ , bootstrap sample size  $\tilde{m}$ , significance level  $\alpha$ .
- 2: **Objective:** Test  $H_0 : \rho = \eta$  vs.  $H_1 : \rho \neq \eta$ .
- 3: Compute test statistic  $\widehat{\mathbb{S}}(\eta \| \rho)$  via

$$\widehat{\mathbb{S}}(\eta \| \rho) = \frac{1}{m(m-1)} \sum_{i=1}^m \sum_{j \neq i}^m \kappa_\rho(\mathcal{X}_i, \mathcal{X}_j),$$

where

$$\begin{aligned} \kappa_\rho(\phi, \psi) = & \int_{\mathbb{X}} \int_{\mathbb{X}} \left[ k(\phi \cup \{u\}, \psi \cup \{v\}) - k(\phi, \psi \cup \{v\}) - k(\phi \cup \{u\}, \psi) + k(\phi, \psi) \right] \rho(u|\phi) \rho(v|\psi) \, du \, dv \\ & + \int_{\mathbb{X}} \left[ \sum_{x \in \phi} [k(\phi \setminus \{x\}, \psi \cup \{v\}) - k(\phi \setminus \{x\}, \psi)] - |\phi| \cdot [k(\phi, \psi \cup \{v\}) - k(\phi, \psi)] \right] \rho(v|\psi) \, dv \\ & + \int_{\mathbb{X}} \left[ \sum_{y \in \psi} [k(\phi \cup \{u\}, \psi \setminus \{y\}) - k(\phi, \psi \setminus \{y\})] - |\psi| \cdot [k(\phi \cup \{u\}, \psi) - k(\phi, \psi)] \right] \rho(u|\phi) \, du \\ & + \left[ \sum_{x \in \phi} \sum_{y \in \psi} k(\phi \setminus \{x\}, \psi \setminus \{y\}) - |\phi| \cdot \sum_{y \in \psi} k(\phi, \psi \setminus \{y\}) - |\psi| \cdot \sum_{x \in \phi} k(\phi \setminus \{x\}, \psi) + |\phi| \cdot |\psi| \cdot k(\phi, \psi) \right]. \end{aligned}$$

- 4: **for**  $b = 1, \dots, \tilde{m}$  **do**
- 5: Draw random multinomial weights  $w_1, \dots, w_m \sim \text{Mult}(m; 1/m, \dots, 1/m)$ ; set  $\tilde{w}_i = (w_i - 1)/m$ .
- 6: Compute bootstrap test statistic  $\widehat{\mathbb{S}}_b^*$  via

$$\widehat{\mathbb{S}}_b^*(\eta \| \rho) = \sum_{i=1}^m \sum_{j \neq i}^m \tilde{w}_i \tilde{w}_j \kappa_p(\mathcal{X}_i, \mathcal{X}_j).$$

- 7: Compute critical value  $\gamma_{1-\alpha}$  by taking the  $(1 - \alpha)$ -th quantile of the bootstrapped statistics  $\{\widehat{\mathbb{S}}_b^*\}_{b=1}^{\tilde{m}}$ .
  - 8: **Output:** Reject  $H_0$  if  $\widehat{\mathbb{S}}(\eta \| \rho) > \gamma_{1-\alpha}$ , otherwise do not reject  $H_0$ .
- 

For concreteness, we provide an example Python implementation of Eq. (12) below:

```
def kernel(X, Y):
    """
    Evaluates a kernel function for two point-sets X and Y.

    Args:
        X, Y: numpy arrays of shape (_, d), collections of d-dimensional points.

    Returns:
        float, value of k(X, Y).
    """

def papangelou(u, X):
    """
    Evaluates the Papangelou conditional intensity (u|X) of a point process
    at location u given observed point-set X.

    Args:
        u: numpy array of shape (d,), a location in the ground space.
        X: numpy array of shape (n, d), the given point-set.

    Returns:
        float, value of rho(u|X).
    """
```

```

def integrate(func, domain):
    """
    Integrates a (univariate or multivariate) function func over domain.
    See scipy.integrate for a list of common numerical integration routines.

    Args:
        func: function, a univariate or multivariate function.
        domain: list of lists, the integration ranges for each variable.

    Returns:
        float, value of the definite integral.
    """

def kappa(X, Y, domain):
    """
    Evaluates Eq.(12) for two point-sets X and Y using kernel() and papangelou().

    Args:
        X, Y: numpy arrays of shape (_, d), collections of d-dimensional points.
        domain: list of lists, ranges specifying the ground space.

    Returns:
        float, value of kappa(X, Y).
    """
    n = X.shape[0]
    m = Y.shape[0]

    k = kernel(X, Y)
    k_X = sum(kernel(np.delete(X, i, axis=0), Y) for i in xrange(n))
    k_Y = sum(kernel(X, np.delete(Y, j, axis=0)) for j in xrange(m))
    k_X_Y = sum(kernel(np.delete(X, i, axis=0), np.delete(Y, j, axis=0))
                for i in xrange(n) for j in xrange(m))

    def integrand_uv(u, v):
        # Double integrand over u and v
        k_uv = kernel(np.vstack((X, u)), np.vstack((Y, v)))
        k_v = kernel(X, np.vstack((Y, v)))
        k_u = kernel(np.vstack((X, u)), Y)
        c_u = papangelou(u, X)
        c_v = papangelou(v, Y)
        return (k_uv - k_v - k_u + k) * c_u * c_v

    def integrand_v(v):
        # Integrand over v
        k_X_v = sum(kernel(np.delete(X, i, axis=0), np.vstack((Y, v)))
                    for i in xrange(n))
        k_v = kernel(X, np.vstack((Y, v)))
        c_v = papangelou(v, Y)
        return ((k_X_v - k_X) - n*(k_v - k)) * c_v

    def integrand_u(u):
        # Integrand over u
        k_Y_u = sum(kernel(np.vstack((X, u)), np.delete(Y, j, axis=0))
                    for j in xrange(m))
        k_u = kernel(np.vstack((X, u)), Y)
        c_u = papangelou(u, X)
        return ((k_Y_u - k_Y) - m*(k_u - k)) * c_u

    # Compute integrals
    term1 = integrate(integrand_uv, domain)
    term2 = integrate(integrand_v, domain)
    term3 = integrate(integrand_u, domain)
    term4 = k_X_Y - n*k_Y - m*k_X + m*n*k

    return term1 + term2 + term3 + term4

```

---
